# Supplementary material for: Comparison of the diagnostic performance of the modified Korean Thyroid Imaging Reporting and Data System for thyroid malignancy with three international guidelines
Source: PubMed Central journal article supplement — Ultrasonography. 2021 Apr 5;40(4):594–601. doi: 10.14366/usg.21056 (PMC8446501; doi:10.14366/usg.21056), 2021-04-05
Supplement: usg-21056-supple.pdf [file usg-21056-supple.pdf]

**Supplementary Table 1. Summary of US features and US-guided FNAB recommendations**

| Guideline                | Sonographic features                                                                                                                                                                             | Recommendation |
|--------------------------|--------------------------------------------------------------------------------------------------------------------------------------------------------------------------------------------------|----------------|
| <b>ACR-TIRADS</b>        |                                                                                                                                                                                                  |                |
| Highly suspicious        | 7 points or more <sup>a)</sup>                                                                                                                                                                   | ≥1.0 cm        |
| Moderately suspicious    | 4 to 6 points <sup>a)</sup>                                                                                                                                                                      | ≥1.5 cm        |
| Mildly suspicious        | 3 points <sup>a)</sup>                                                                                                                                                                           | ≥2.5 cm        |
| Not suspicious           | 2 points <sup>a)</sup>                                                                                                                                                                           | Not indicated  |
| Benign                   | 0 points <sup>a)</sup>                                                                                                                                                                           | Not indicated  |
| <b>AAACE/ACE/AME</b>     |                                                                                                                                                                                                  |                |
| High-risk                | Nodules with at least 1 of the following features: marked hypoechoogenicity, spiculated or lobulated margins, microcalcifications, taller than wide shape, extrathyroidal growth                 | ≥1.0 cm        |
| Intermediate-risk        | Slightly hypoechoic or isoechoic nodules, with ovoid-to-round shape, smooth or ill-defined margins                                                                                               | >2.0 cm        |
| Low-risk                 | Cysts, mostly cystic nodules with reverberating artifacts and not associated with suspicious US signs, isoechoic spongiform nodules                                                              | Not indicated  |
| Unclassified             | Isolated macrocalcification                                                                                                                                                                      | –              |
| <b>EU-TIRADS</b>         |                                                                                                                                                                                                  |                |
| High-risk                | At least 1 of the following features of high suspicion: irregular shape, irregular margins, microcalcifications, marked hypoechoogenicity (and solid)                                            | >1.0 cm        |
| Intermediate-risk        | Ovoid, smooth, mildly hypoechoic<br>No features of high suspicion                                                                                                                                | >1.5 cm        |
| Low-risk                 | Ovoid, smooth, isoechoic/hyperechoic<br>No features of high suspicion                                                                                                                            | >2.0 cm        |
| Benign                   | Pure cyst, entirely spongiform                                                                                                                                                                   | Not indicated  |
| Unclassified             | Isolated macrocalcification                                                                                                                                                                      | –              |
| <b>Modified K-TIRADS</b> |                                                                                                                                                                                                  |                |
| High suspicion           | Solid hypoechoic nodule with any of three suspicious US features (microcalcification, nonparallel orientation, spiculated/microlobulated margin);                                                | >1.0 cm        |
| Intermediate suspicion   | (1) Solid hypoechoic nodule without any of three suspicious US features or (2) partially cystic or isohyperechoic nodule with any of three suspicious US features, (3) entirely calcified nodule | >1.0 or 1.5 cm |
| Low suspicion            | Partially cystic or isohyperechoic nodule without any of three suspicious US features;                                                                                                           | >2.0 cm        |
| Benign                   | (1) Spongiform, (2) partially cystic nodule with intracystic echogenic foci with comet tail artifact, (3) pure cyst                                                                              | Not indicated  |

US, ultrasonography; FNAB, fine-needle aspiration biopsy; ACR, American College of Radiology; TIRADS, Thyroid Imaging Reporting and Data System; AAACE/ACE/AME, American Association of Clinical Endocrinologists/American College of Endocrinology/Associazione Medici Endocrinologi; EU, European; K-TIRADS, Korean Thyroid Imaging Reporting and Data System.

<sup>a)</sup>Points are allotted for all ultrasonographic features of a nodule, with more suspicious features being awarded more points.
